1 **Measles fusion complexes from central nervous system clinical isolates: decreased**  
2 **interaction between hemagglutinin and fusion proteins**

3 Cyrille Mathieu<sup>1,2,3\*</sup>, Tiago Nascimento Figueira<sup>1,2</sup>, Amanda R. Decker<sup>1,2</sup>, Marion Ferren<sup>1,2,3</sup>,  
4 Tiziana F. Bovier<sup>1,2,4</sup>, Eric M. Jurgens<sup>1,2,5</sup>, Tara C. Marcink<sup>1,2</sup>, Anne Moscona<sup>1,2,6,7</sup>, and  
5 Matteo Porotto<sup>1,2,4\*</sup>

6 <sup>1</sup>Center for Host-Pathogen Interaction, Columbia University Vagelos College of Physicians  
7 and Surgeons, New York, New York USA.

8 <sup>2</sup>Department of Pediatrics, Columbia University Vagelos College of Physicians and Surgeons,  
9 New York, New York USA.

10 <sup>3</sup>CIRI, Centre International de Recherche en Infectiologie, Team Immunobiology of the Viral  
11 infections, Univ Lyon, Inserm, U1111, CNRS, UMR5308, Université Claude Bernard Lyon 1,  
12 Ecole Normale Supérieure de Lyon, 69007, Lyon, France.

13 <sup>4</sup>Department of Experimental Medicine, University of Campania, 81100 Caserta, Caserta,  
14 Italy.

15 <sup>5</sup>Weill Cornell Medical College, New York, New York, USA.

16 <sup>6</sup>Department of Microbiology & Immunology, Columbia University Vagelos College of  
17 Physicians and Surgeons, New York, New York, USA.

18 <sup>7</sup>Department of Physiology & Cellular Biophysics, Columbia University Vagelos College of  
19 Physicians and Surgeons, New York, New York, United States.

20

21 \*To whom correspondence should be addressed: Cyrille Mathieu ([cyrille.mathieu@inserm.fr](mailto:cyrille.mathieu@inserm.fr))  
22 and Matteo Porotto ([mp3509@cumc.columbia.edu](mailto:mp3509@cumc.columbia.edu)).

23 **One Sentence Summary:** Measles CNS adapted fusion complexes have altered H/F  
24 interaction.

25 **Key words:** Viral fusion; CNS adaptation; viral infectivity.

26 **Abstract:**

27 Measles virus (MeV) viral entry is mediated by a fusion complex comprised of a  
28 receptor binding protein (hemagglutinin, H) and a fusion protein (F). The wild type H/F  
29 complex requires interaction with specific proteinaceous receptors (CD150/SLAM and nectin-  
30 4) in order to be activated. In contrast the H/F complexes isolated from viruses infecting the  
31 central nervous system (CNS) do not require a specific receptor. A single amino acid change  
32 in the F protein (L454W) was previously identified in two patients with lethal sequelae of  
33 MeV CNS infection, and the F bearing this mutation mediates fusion even without the H  
34 protein. We show here that viruses bearing the L454W fusion complex are less efficient than  
35 wt virus at targeting receptor expressing cells and that this defect is associated with a  
36 decreased interaction between the H and the F proteins.

37

38 **Importance:**

39 Measles (MeV) infection can cause serious complications including measles inclusion body  
40 encephalitis (MIBE) and subacute sclerosing panencephalitis (SSPE). MIBE and SSPE are  
41 relatively rare but lethal. We have shown that the fusion complex of CNS adapted clinical  
42 samples can spread in the absence of known receptor. We now provide evidence that HRC  
43 mutations leading to CNS adaptation come at a cost to the efficiency of viral entry.

44

45 **Introduction:**

46 Despite the availability of an effective measles virus (MeV) vaccine and efforts to  
47 increase vaccine coverage by the WHO, UNICEF, and their partners, MeV has not been  
48 eradicated and the estimated global measles death toll rose from 89,780 in 2016 to 207,500 in  
49 2019(1). The SARS-CoV-2 pandemic and associated countermeasures reduced the incidence

50 of other respiratory viral infections but also halted vaccination, increasing the risk of measles  
51 outbreaks in the future(1).

52 MeV is the most infectious virus known to humans, transmits via the air, and causes systemic  
53 infection. The virus enters cells via two cellular receptors: CD150/SLAM expressed by  
54 subsets of immune cells(2) and nectin-4 expressed by epithelial cells(3, 4). Central nervous  
55 system (CNS) sequelae associated with active viral infection include subacute sclerosing  
56 panencephalitis (SSPE) and measles inclusion body encephalitis (MIBE) (5-10). These CNS  
57 complications have been associated with viral evolution and specific CNS adaptation,  
58 specifically with alterations in the viral fusion mechanism(11, 12).

59 MeV expresses two envelope glycoproteins that make up the fusion complex. The H protein  
60 mediates receptor binding, followed by triggering of the F protein, which leads to merger of  
61 the viral envelope with target cell membranes. We refer to the H/F pairs of MeV as the viral  
62 fusion complex, since these proteins act in concert. F is synthesized as a precursor ( $F_0$ ) that is  
63 cleaved within the cell to yield the pre-fusion F complex comprising three C-terminal  $F_1$   
64 subunits associated non-covalently with three N-terminal  $F_2$  subunits. This trimeric F  
65 structure is kinetically trapped in a metastable conformation, primed for fusion activation  
66 upon engagement of the H glycoprotein by the cell-surface receptor (either CD150/SLAM or  
67 nectin-4)(2-4, 13-15). After receptor engagement by H, the pre-fusion F undergoes a structural  
68 transition, extending and inserting its hydrophobic “fusion peptide” into the target cell. During  
69 entry, F refolds into a so-called “trimer of hairpins” (or 6-helix bundle) post-fusion structure  
70 that brings together the N-terminal heptad repeat (HRN) and the C-terminal heptad repeat  
71 (HRC), and the viral and cell membranes fuse(16-23). Peptides derived from the HRC region  
72 of the  $F_2$  ectodomain inhibit paramyxovirus entry with varying activity(19, 24-32). We and  
73 others have shown that fusion complexes from CNS isolated clinical samples are dysregulated  
74 and do not require H-receptor interaction for mediating fusion(8, 10, 33, 34), and for a

75 specific mutated F (L454W) even the presence of the H was dispensable for cell-to-cell fusion  
76 in transfected cells(8, 10, 34). Here we investigated whether this phenotype was correlated  
77 with diminished H-F interaction and we highlight that fusion in the absence of receptor  
78 interaction is the combined effect of a decrease in the stability of F as well as a decrease in F's  
79 interaction with H.

## 80 **Results:**

### 81 *Measles virus F glycoprotein from neuropathogenic viruses*

82 MeV F glycoproteins with specific single residue alterations (S262R, L454W, T461I,  
83 and N462K) have been associated with neuropathogenic measles strains that were either  
84 isolated from patients or generated in laboratory settings (9, 12, 34, 35). We mapped these  
85 mutations onto x-ray structures of the pre-fusion (36) conformations of F (Fig.1A),  
86 highlighting the locations of these mutations in MeV F. The S262R mutation occurs at the  
87 interface of three protomers in the head region of the pre-fusion structure. The mutation from  
88 Ser to Arg at residue 262 results in a clash within each monomer in the existing crystal  
89 structure . These microenvironmental changes are likely to affect the conformational stability  
90 of the F. The other three mutations (L454W, T461I, and N462K) were located within the C-  
91 terminal heptad repeat domain (HRC). In the pre-fusion structure, the L454W mutation would  
92 also perturb the current pre-fusion structure. The T461I and N462K mutations occur in a  
93 well-ordered  $\alpha$ -helical region of the HRC domain. These three mutations (L454W, T461I, and  
94 N462K) occur in the portion of the HRC domain where the head and stalk regions of the pre-  
95 fusion conformation meet. Interactions at this region may be important for stabilizing the pre-  
96 fusion state and mutations in this junction would affect stability of the MeV-F prefusion  
97 structure, as our previous data have shown (12, 34).

98

99

## 100 ***Impact of hyperfusogenic mutations in F on H-F interaction***

101 We previously suggested that the ability of HRC mutants to fuse in the absence of  
102 known receptors could be at least partly due to reduced interaction between H and F(34). The  
103 interaction between F and H and the impact of mutations in the HRC domain (*i.e.*, L454W,  
104 T461I and N462 may be affected by thermal instability – obscuring the effect of the specific  
105 mutations -- we included the highly unstable mutant F-S262R (11, 12, 33, 35) which interacts  
106 efficiently with H. H-F interaction was assessed with both the cleavable F proteins (Fig. 2A)  
107 and the cleavage site mutant (CSM) version of these F proteins (Fig. 2B), to distinguish  
108 between effects on the  $F_0$  and the  $F_1$  form of F. Results are presented as the average of 3  
109 separate experiments  $\pm$  SD (Fig.2C). Densitometric analysis was used to normalize the results  
110 to total protein content and to convert the data to graphs (average of 3 separate experiments  $\pm$   
111 standard deviation; Fig. 2C). There is significant reduction in the amount of  $F_1$  co-  
112 immunoprecipitated with H for the HRC hyperfusogenic mutants (*i.e.* , L454W, T461I and  
113 N462K) compared to the *wt* F ( $P = 0.0023$ ,  $P = 0.0030$  and  $P = 0.0014$ , respectively; two-way  
114 ANOVA with multiple comparisons against *wt* F, corrected with the Dunnett hypothesis test).  
115 For the other hyperfusogenic mutant, F S262R, there was more co-immunoprecipitated  $F_1$   
116 protein when compared to the HRC mutants. There were no differences in co-  
117 immunoprecipitation of  $F_0$ . Thus, mutations in HRC associated with a hyperfusogenic  
118 phenotype decrease the ability of H to interact with the active  $F_1$  form of F.

119

## 120 **Viral evolution leads to compensatory mutation**

121 MeV bearing the L454W F protein, when grown at 37°C in cell culture, acquired a  
122 compensatory mutation (E455G) that re-balanced F's stability and dependence on H and  
123 cellular receptor for mediating fusion (12). The E455G mutation is shown in Fig. 3A, alone  
124 and in combination with L454W. Tryptophan (W454) contains a bulky aromatic sidechain

125 when compared to leucine (L454), while glutamic acid (E455) is larger than glycine (G455).  
126 We determined whether the E455G mutation restored H-F interaction (Fig. 3). H-F  
127 interaction for wt ,L454W, E455G, and L454W/E455G F proteins is shown in Fig. 3 .  
128 Densitometric analysis was used to normalize the results to total protein content and to  
129 convert the data to graphs (average of 3 separate experiments  $\pm$  SD; Fig. 3C). The *wt* versus  
130 the L454W F was significantly different (as seen in Fig.2), however the mutant E455G F and  
131 the double mutant L454W/E455G F co-immunoprecipitated similarly to the *wt* F. The E455G  
132 compensatory mutation in the HRC domain of the F resulted in a *wt* phenotype. We  
133 previously showed that E455G restored F's stability (as measured by sensitivity to thermal  
134 activation) and restored F's dependence on H-receptor interaction for fusion(12). Fig. 3  
135 reveals that E455G also reestablished interaction of H with the active **F<sub>1</sub>** form of F.

136

### 137 ***Loss of H-F interaction delays viral entry.***

138 One of the consequences of the loss of interaction between F and H is the loss of  
139 protection of F from spontaneous triggering(37). Additionally, hyperfusogenic MeV F HRC  
140 mutants proteins are less stable in their pre-fusion state, as measured by their temperature  
141 sensitivity, compared to the *wt* F protein. The hyperfusogenic F proteins mediate fusion even  
142 in the absence of either CD150/SLAM or nectin-4 receptors(10, 34). We have shown that this  
143 decreased F stability, however, results in viruses that are inactivated at lower temperatures  
144 than *wt* virus (10), because F transitions to its post-fusion state more readily, rendering the  
145 viral particle non-infectious. We asked whether the destabilizing mutations in F of the  
146 neuropathogenic variants affect viral entry into SLAM-expressing cells (38). To do so, we  
147 used an assay developed for a related paramyxovirus, human parainfluenza virus 3 (HPIV3).  
148 For HPIV3 we have shown that the kinetics of F protein activation and viral entry modulate  
149 the potency of HR derived peptides(37, 39), and therefore this modulation can be used as a

150 tool to quantitate F activation and entry. Applying this strategy to MeV, we determined the  
151 sensitivity of MeV F to inhibition by MeV HR derived peptides, using a previously described  
152 dimeric HR lipopeptide, HRC4. In Fig. 4A, 1 $\mu$ M of HRC4 peptide was added at time points  
153 from 0 to 2 hours during infection of Vero-SLAM cells. Peptide addition at time zero  
154 inhibited 100% of infection for all the viruses (wt and the three viruses bearing the mutated F  
155 proteins). Peptides added after 1 hour decreased inhibition to 30% for wt virus, meaning that  
156 most of the wt virus had already entered, while the mutants bearing F T461I and N462K were  
157 50% inhibited and the mutant bearing F L454W was 70% inhibited. After 90 min, the peptide  
158 continued to inhibit the mutants (from 20 to 30% of viral entry). No inhibitory effect was  
159 observed after 2 hours. This experiment reveals that for wt viruses, the window of HRC4  
160 inhibitor sensitivity is significantly shorter than that of the viruses bearing the mutated Fs. The  
161 longer time of inhibitor susceptibility of the HRC mutant Fs suggests that wt H-F is more  
162 efficient for entry in the presence of receptors.

163

164 ***Easier triggering of HRC hyperfusogenic mutants correlates with longer time to completion***  
165 ***of fusion.***

166 For HPIV3, fusion requires engagement of the receptor binding protein (the  
167 hemagglutinin neuraminidase, HN) beyond initial triggering of the F protein. This  
168 engagement of HN is essential for F's function until membrane merger (37). A similar  
169 mechanism of ongoing activation of the fusion process by receptor-engaged H could explain  
170 our observations for MeV. We showed that constant interaction with F by receptor-engaged H  
171 may allow wt H-F to fuse even in the presence of F-targeted anti-MeV peptides (40). As  
172 above, we also previously showed that for HRC peptide fusion inhibitors, adding a lipid  
173 moiety improves antiviral potency over time(40). In this case a cholesterol-conjugated dimeric

174 peptide (HRC4) was inhibitory as long as 6h after *in vitro* (41). Without a lipid moiety  
175 (HRC1), peptide was effective only at early time points after infection.

176 We hypothesize that the loss of H-F interaction affects both the triggering of HRC  
177 mutants and their ability to fuse in the presence of inhibitor. In Fig. 4B we assessed weak  
178 peptide inhibitor (HRC1) for inhibition of wt and mutant F fusion. The assay measures the  
179 fusion of cells that express viral envelope glycoproteins (MeV IC323 H/F) with cells that  
180 express the MeV receptor SLAM. HRC1 peptide inhibited fusion at early time points (1h, Fig.  
181 4 B). As expected, this inhibition decreased below 70% after 3h and below 40% for the wt F  
182 and S262R F respectively after 6h. In contrast, for the H/L454W F fusion complex, HRC1  
183 peptide inhibited over the time course of this fusion assay, significantly better than for the wt  
184 complex (\*\*p value, Mann-Whitney U-Test). A parallel assay was performed with the HRC4  
185 peptide, which completely inhibited fusion of all MeV Fs (Fig. S1).

186 HRC peptides are thought to stabilize F protein intermediates during the fusion process  
187 after insertion into the target cell membrane but before refolding to the post-fusion state. The  
188 stabilization of the transient intermediate state of F by HRC peptides was used to identify  
189 discrete steps in the fusion process (37, 42). In Fig. 4C we determined whether the HRC1  
190 fusion blockade for the HRC mutated F occurs at the same transitional state. Red blood cells  
191 (RBCs) were allowed to interact with cells expressing the MeV F hyperfusogenic mutants  
192 along with a chimeric receptor binding protein expressing the MeV H stalk and the globular  
193 head of HPIV3 HN. This chimeric protein can engage the sialic acid receptor on the RBCs  
194 and initiate MeV F-activation for the neuropathogenic F proteins (8, 34, 43). The read-out for  
195 peptide inhibition is irreversible binding of the RBCs to the F-expressing cells and/or fusion.  
196 This assay provides a measure of the efficiency with which HRC1 binds and retains F in its  
197 transitional intermediate state, preventing membrane merger (Fig.4C). 293T cells co-  
198 expressing the chimeric receptor binding protein MeV H-HN and MeV F (hyperfusogenic



199 mutants) were incubated with RBCs at 4 °C, then transferred to 37 °C in the presence of  
200 HRC1 peptides (1µM). Zanamivir, a small molecule sialic acid analog that blocks HN-  
201 receptor interaction was added after 1 h to disengage cells that were bound by HN-globular  
202 head engagement alone. Note that wt F was not used in this assay since it is too stable to be  
203 activated under these conditions. The proportion of RBCs either free, reversibly bound by  
204 HN-receptor interaction (and therefore released by zanamivir), irreversibly bound by F protein  
205 bridging (following insertion of the fusion peptide in the target cell membrane), or fused was  
206 quantified. For all three MeV F HRC mutants the larger majority of the cell population  
207 remained irreversibly bound and very little fusion was observed, confirming the ability of  
208 HRC1 to block F in its transitional state after insertion of the fusion peptide in the target cell  
209 membrane. In contrast, the percentage of irreversibly bound cells decreased to 30%  
210 concomitantly with an increase in fusion up to 50% for the S262R hyperfusogenic mutant,  
211 confirming that this F can “override” inhibition by the peptide. The HRC1 peptide stabilizes  
212 the intermediate fusion state for all the F proteins that bear mutations in the heptad repeat  
213 domain. Taken together, these results confirm that while the reduction in H-F interaction  
214 allows HRC hyperfusogenic mutants to fuse in the absence of receptor — which seems to be a  
215 benefit in the CNS— it also decreases their fusion compared to wt virus in presence of  
216 receptor by reducing complete fusion after triggering. Outside the CNS, this reduced fusion is  
217 a disadvantage.

218

## 219 **Discussion**

220 The altered HRC region of the CNS-adapted MeV F proteins produced viruses that can fuse  
221 and infect without known receptors for H. While H-F interaction is essential for fusion and  
222 infection by wt MeV, these F proteins (L454W, T461I and N462K; fig 1A) interact less with  
223 H but nevertheless mediate infection *in vitro* (L454W, T461I and N462K) (10, 34), in models

224 of CNS infection (L454W, and T461I)(12) and *in vivo* (L454W) (10) more effectively than  
225 wt virus in the absence of SLAM or Nectin-4 receptors. As anticipated based on previous  
226 data(10, 12, 34), the hyperfusogenicity conferred by the alterations in the MeV F HRC region  
227 affects both functional and physical interactions with H. The E455G revertant restored wt-like  
228 properties in the context of the L454W-bearing F, and when introduced singly into the F  
229 protein led to an extremely stable F(12). We speculate that introducing W454 into the  
230 prefusion F stalk results in local destabilization that enhances F activation, even in the  
231 absence of receptor. The nearby mutation G455 may alter the structure sufficiently to restore  
232 the “wt” properties. When the viral quasispecies formed by L454W and L454W/E455G F  
233 bearing viruses is cultivated in human brain organoids, the L454W/E455G F bearing virus is  
234 eliminated within 10 days confirming that the L454W F bearing virus is fit for growth in CNS  
235 tissues(12). The virus bearing the S262R mutation in F is neuropathogenic *in vivo* (11, 35),  
236 and we observed no significant differences in H-F interaction. A S262G mutation in F (along  
237 with several other mutations) was found in virus from a SSPE clinical case (8). Thus, while  
238 destabilizing the F protein significantly improves MeV’s ability to spread in the brain, the loss  
239 of H-F interaction may not be necessary for CNS adaptation.

240 MeV H-F interaction is key for the steps after F insertion in the target membrane, to  
241 complete fusion. The viruses bearing F mutations that lead to CNS spread are more  
242 susceptible to fusion inhibitory peptides(10). We attribute this, at least in part, to the fact that  
243 the H does not continue to activate F after initial triggering.

244 In Fig. 5 we propose models of viral infection with wt MeV and the CNS adapted  
245 variants, incorporating the findings in this work as well as work from others. A common  
246 pattern for neuropathogenic F variants is decreased stability of F (as assessed by sensitivity to  
247 heat) and a fusion complex that mediates cell-to-cell fusion in the absence of either  
248 CD150/SLAM or nectin-4(8, 10, 12, 34, 44). These properties confer an infectivity cost, since

249 they are significantly slower to complete the fusion process after initial triggering. These  
250 features together with lower viability (10) make these viruses adapt to cell-to cell transmission  
251 after initial infection but also likely mean that they are less transmissible.

252

253

254 **Funding sources:** The work was supported by grant from NIH AI121349, NS091263, and

255 NS105699 to MP, from French ANR NITRODEP (ANR-13-PDOC-0010-01) to CM.

256

257 **Figure legends**

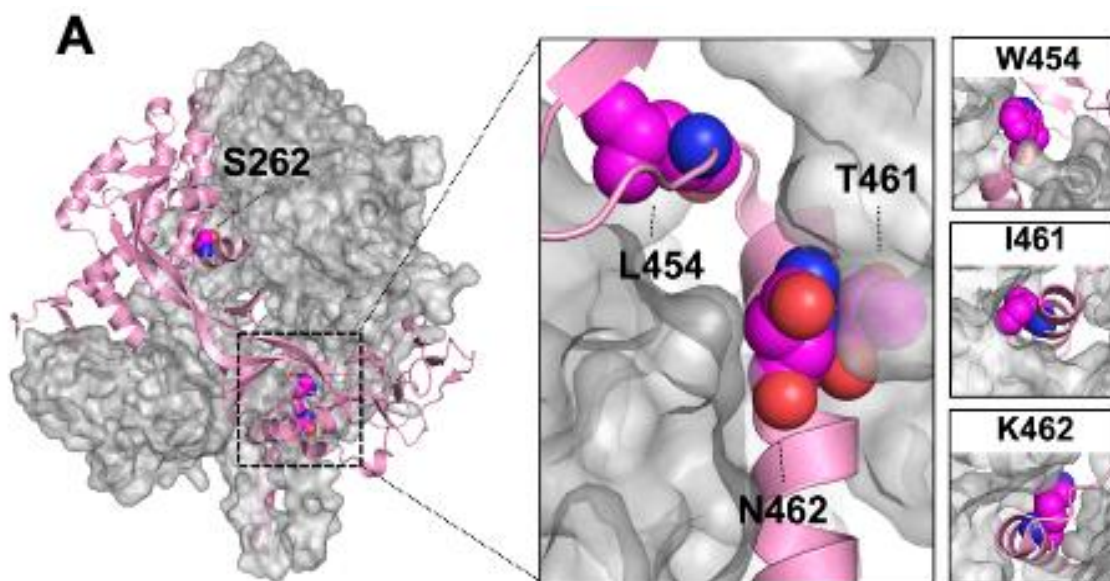

258

259 **Figure 1** – Crystal structure of the trimeric measles F (PDBID:5YXW) in the prefusion state.

260 Monomer is shown in pink. Zoomed in view shows close proximity of residues L454, T461,

261 and N462 near the top of the prefusion F stalk. Left-most panels show potential orientations of

262 mutations W454, I461, and K462 as modeled by pymol with minimal sculpting to reduce

263 steric clashes. Three substitutions (L454W, T461I and N462K) in the HRC domain in

264 neuropathogenic strains are shown. The residue S262 (mutated here to R) was previously

265 described in the hyperfusogenic F variant.

266

267

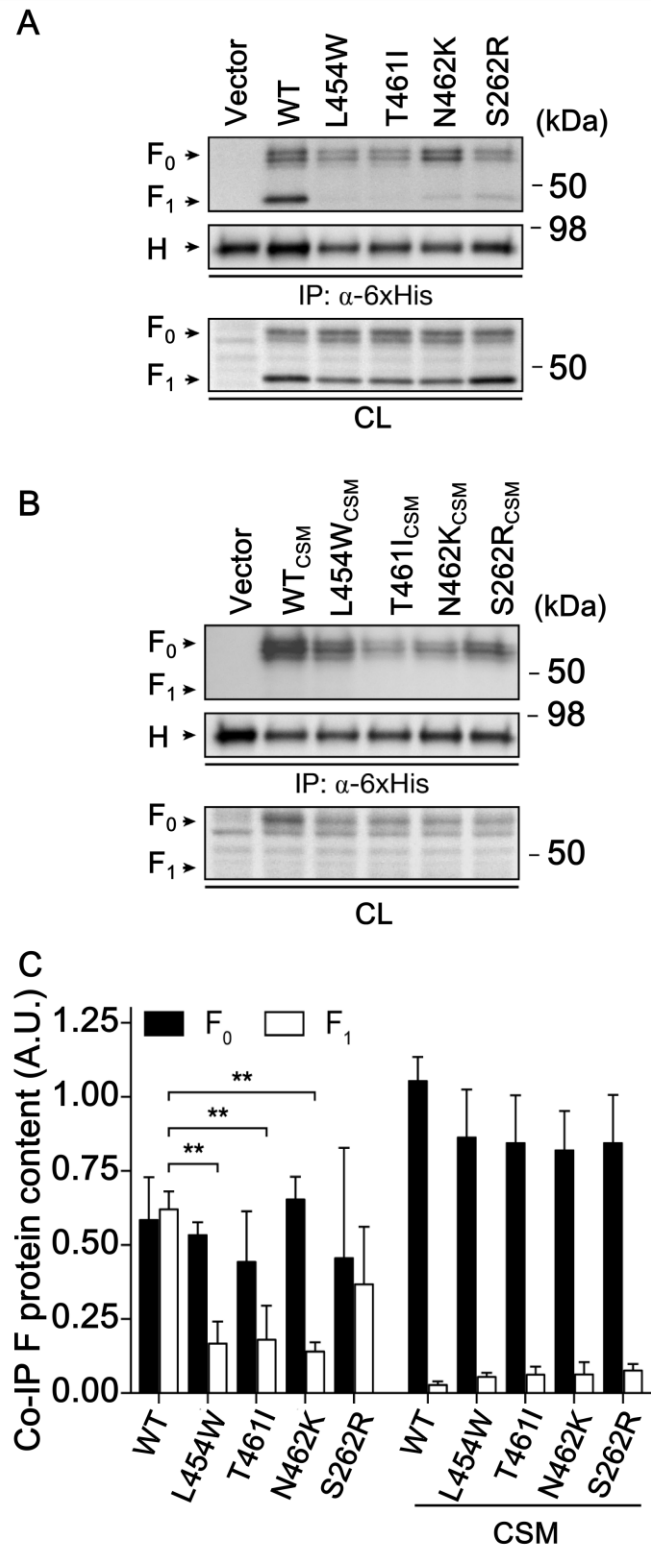

268

269 **Figure 2 – The effect of hyperfusogenic MeV F HRC domain mutations on MeV H**  
 270 **functional and physical interactions with F<sub>0</sub> and F<sub>1</sub>.** (A-B) Cell lysates from 293T cell  
 271 cultures co-expressing MeV H-6xHis and F *wt*, L454W, T461I, N462K or S262R proteins  
 272 were immunoprecipitated with an anti-6xHis antibody. Cleavable (A) and non-cleavable (B)

273 forms of F were included in the experiment. Precipitates were analyzed by western blotting  
274 using anti-MeV F HRC and anti-6xHis (top panels) while cell lysates were blotted using anti-  
275 MeV F HRC (bottom panels). (C) Densitometry measurements of co-immunoprecipitated  
276 MeV F protein detected through western blot analysis. Protein content was normalized for the  
277 total F protein in cell lysates and the immunoprecipitated H protein. Results are the average of  
278 three independent replicates. Error bars correspond to the standard deviation. \*\*,  $P \leq 0.01$ .  
279

280

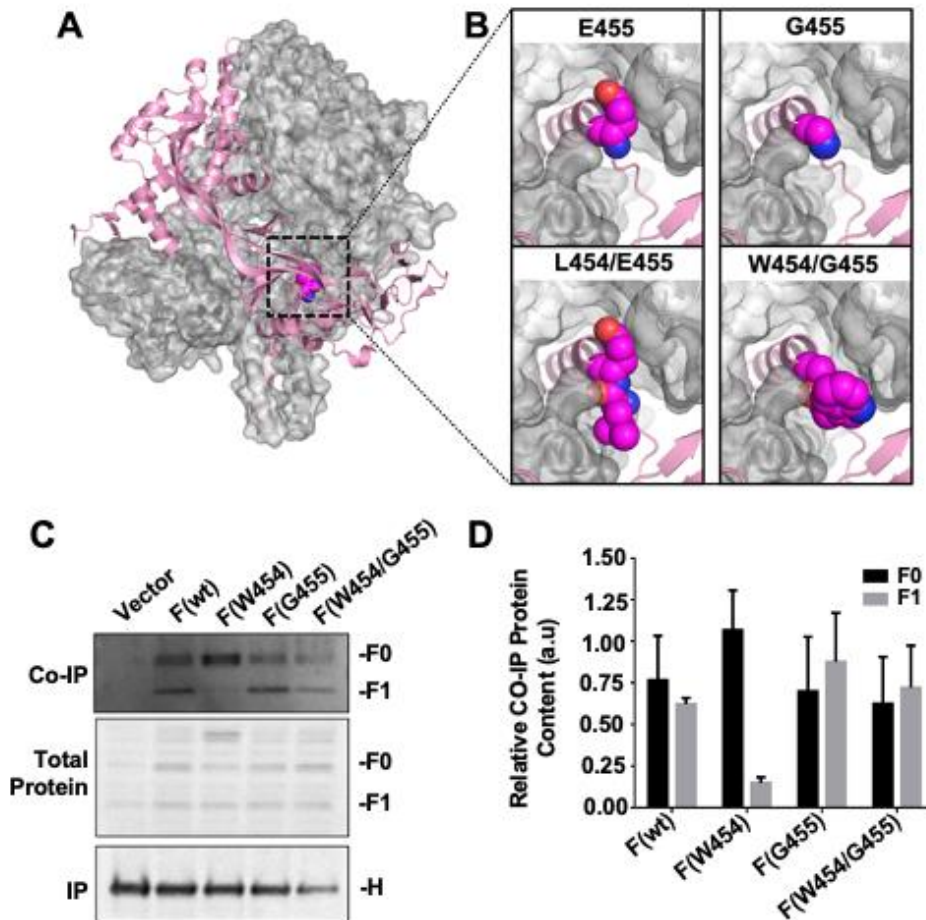

281

282 **Figure 3 – The effect of F protein’s E455G compensatory mutation on H protein’s**  
283 **interaction with F<sub>0</sub> and F<sub>1</sub>.**(A) Prefusion F crystal structure (PDBID: 5YXW). (B) Zoomed  
284 in views near the top of the prefusion F stalk region with E455 (top left) and L454/E455  
285 (bottom left) shown as spheres. Mutations G455 (top right) and W454/G455 (bottom right)  
286 were substituted in pymol with minimal sculpting to reduce steric clashes. (C and D) Cell  
287 lysates from 293T cell cultures co-expressing MeV H-6xHis and F *wt*, L454W, E455G, or  
288 L454W/E455G proteins were immunoprecipitated with an anti-6xHis antibody. Cleavable (B)  
289 and non-cleavable (C) forms of F were included in the experiment. Precipitates were analyzed  
290 through western blotting using anti-MeV F HRC and anti-6xHis (top panels) while cell lysates  
291 were blotted using anti-MeV F HRC (bottom panels). (D) Densitometry measurements of co-  
292 immunoprecipitated MeV F protein detected by western blot analysis. Protein content was

293 normalized for the total F protein in cell lysates and the immunoprecipitated H protein. There  
294 was no statistical difference (unpaired T-test) between the levels of **F<sub>0</sub>** that were co-  
295 immunoprecipitated for each allele. There was also no statistical difference between F(*wt*) and  
296 either allele that contained E455G (single and double mutant) for **F<sub>1</sub>** levels. However, the  
297 difference between the F(*wt*) and F(L454W) **F<sub>1</sub>** that co-immunoprecipitated with H was  
298 extremely statistically significant (P = 0.0007). Error equals +/- SEM. N = 3 biological  
299 replicates  
300  
301



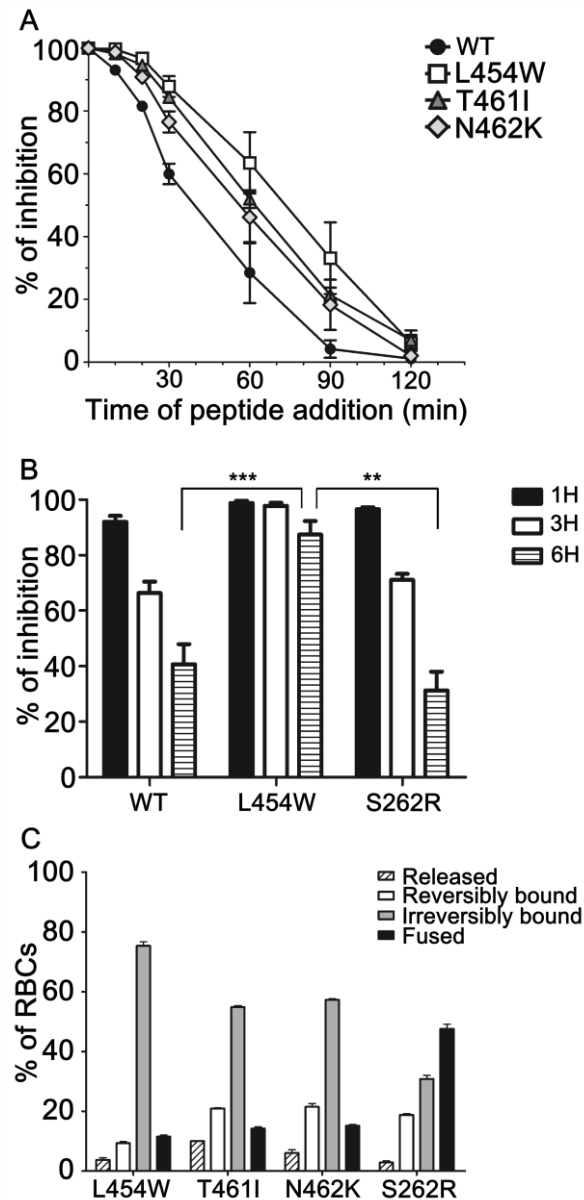

302

303 **Figure 4 – HRC hyperfusogenic mutants fuse less in presence of entry receptor- (A)**

304 Inhibition by MeV HRC4 peptides added at different times after infection reveals differences

305 in the rate of F activation. Vero-SLAM cells were infected with wt or the indicated viruses at

306 a multiplicity of infection of  $6.7 \times 10^{-4}$ . The MeV HRC4 fusion inhibitory peptide was added

307 at the time points noted to a final concentration of 1  $\mu$ M. Cells were overlaid with agarose at

308 90 min and plaques were stained and counted at 36 h. The percent inhibition of viral entry,

309 normalized to 100% inhibition at time zero, is shown as a function of the time of peptide

310 addition. Data points are means ( $\pm$  standard error) for triplicate experiments. - (B) Fusion of

311 MeV H/F co-expressing cells with SLAM-bearing cells in the presence of unconjugated

312 peptides (HRC1 at 1  $\mu$ M) was quantitated at 1 h , 3h or 6 h using a  $\beta$ -galactosidase  
313 complementation assay. Results are presented as percent reduction in luminescence (y axis)  
314 compared with no treatment. Each point is the mean ( $\pm$  standard error) of results from 3 to 5  
315 separate experiments (\*\*,  $P < 0.01$ ; \*\*\*,  $P < 0.001$  [Mann-Whitney-U test]). (C) Role of  
316 receptor binding protein (H-HN) after F has inserted its hydrophobic fusion peptide into the  
317 target cell: progression to membrane merger in the presence of H-F interaction. If H-F  
318 interaction is functional, processed F is activated to the stage of fusion peptide insertion  
319 captured by unconjugated peptides, and then proceeds to membrane merger. Monolayers of  
320 cells co-expressing H-HN and processed F proteins (as indicated on the axis) were allowed to  
321 bind to receptor-bearing RBCs at 4°C. Unbound RBCs were washed away, and cells were  
322 incubated with standard HRC1 peptides (1  $\mu$ M) at 37°C for 60 min. The values on the y axis  
323 reflect the quantity of RBCs that were released by H-HN neuraminidase (striped bar),  
324 reversibly bound by H-HN-receptor interaction (white bar), irreversibly bound (gray bar), or  
325 fused (black bar). The values are means ( $\pm$ standard deviations) of results from triplicate  
326 samples and are representative of the experiment repeated at least four times.

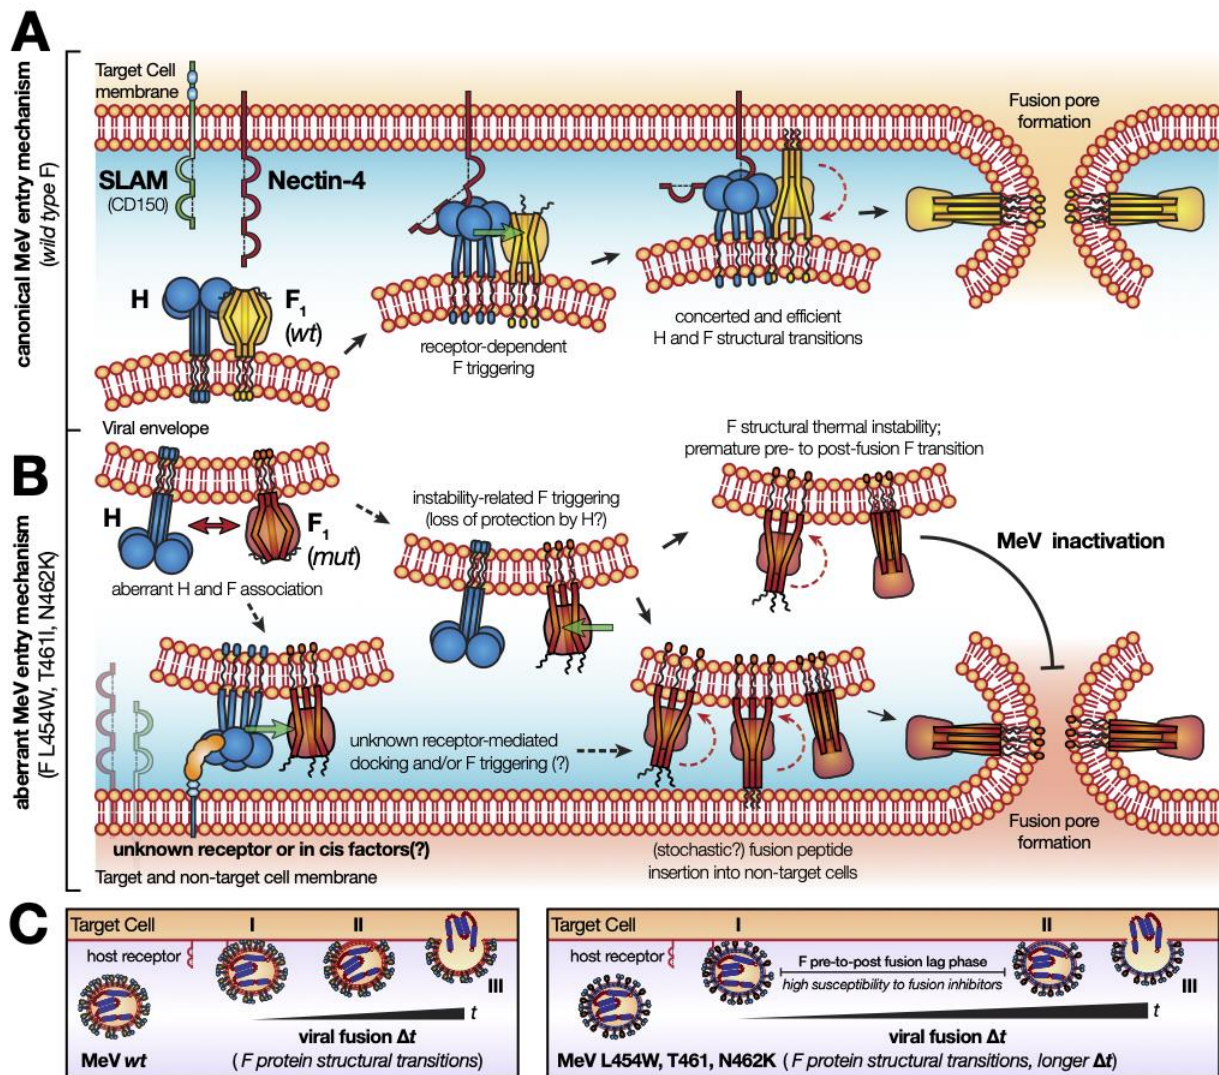

327

328 **Figure 5 – Model for the hyperfusogenic entry mechanism of neuropathogenic MeV**

329 **mutant strains. (A)** The *wt* MeV entry mechanism is characterized by the concerted action of

330 the H and F glycoprotein complex. Upon H-mediated CD150/SLAM or Nectin-4 receptor

331 recognition, and subsequent F triggering, both H and F undergo a series of conformational

332 changes that guide fusion of the cell membrane and viral envelope. H anchors the virus to the

333 cell surface and activates the F to insert its fusion peptide trimers into the cell membrane and

334 undergo a conformational transition, the driving force for lipid mixing and fusion. **(B)** The

335 hyperfusogenic phenotype of neuropathogenic MeV variants is associated with single amino

336 acid mutations in F (L454W, T461I and N462K). Altered association with H triggers the

337 mutated F into unstable fusogenic conformations. The lower energy barrier between the pre-

338 and post-fusion (6HB) conformations leads to premature structural transitions of F and  
339 consequent viral attenuation/inactivation. Yet, the mutated F can insert into non-targeted cell  
340 types, such as neurons, promoting MeV aberrant infection. (C) The coordinated structural  
341 transitions of H and F promote entry by *wt* MeV after receptor engagement (left panel). In  
342 hyperfusogenic MeV variants, with loss of H-to-F interaction, entry kinetics are slower, with a  
343 lag between the F pre- and post-fusion conformations (right panel). This feature enhances  
344 susceptibility to F-specific fusion inhibitory peptides acting at this stage.

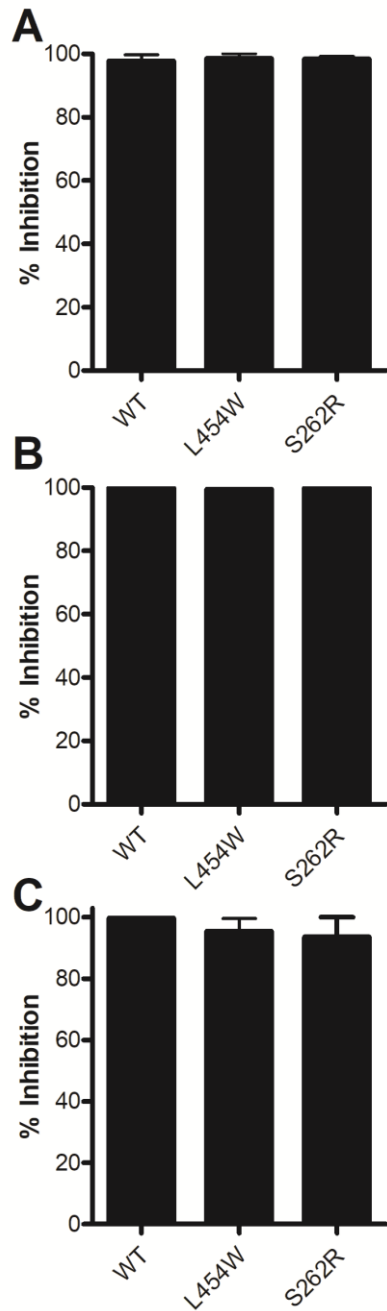

345

346 **FIG S1.** Fusion of MeV H/F co-expressing cells with SLAM-bearing cells in the presence of  
347 unconjugated peptides (HRC4, dimer peptide with cholesterol, 1  $\mu$ M) was quantitated at 1 h  
348 (A) 3h (B) or 6 h (C), using a  $\beta$ -galactosidase complementation assay. Results are presented  
349 as percent reduction in luminescence (y axis) compared with no treatment. Each point is the  
350 mean ( $\pm$  standard error) of results from 3 to 5 experiments.

351

352 **Materials and Methods**

353 **Peptides:** MeV F derived fusion inhibitor peptides HRC1 and HRC4 were previously  
354 described (40). Briefly 36aa long peptides derived from the heptad repeat region at the C-  
355 terminal of the MeV F protein were synthesized (using the wt sequence or the L454W  
356 sequence). Monomeric unconjugated (HRC1) or dimeric cholesterol conjugated (HRC4)  
357 forms of the peptides were used in this study.

358 **Plasmids and reagent.** The genes of MeV IC323 H and F proteins were codon optimized,  
359 synthesized, and sub cloned into the mammalian expression vector pCAGGS. Plasmids  
360 encoding nectin 4 and CD150/SLAM were commercially acquired.

361 **Cells.** 293T (human kidney epithelial) and Vero-SLAM (African green monkey kidney) cells  
362 were grown in Dulbecco's modified Eagle's medium (DMEM; Gibco, Invitrogen)  
363 supplemented with 10% fetal bovine serum (FBS) and antibiotics in 5% CO<sub>2</sub>. The Vero-  
364 SLAM culture medium was supplemented with Geneticin.

365 **HRC4 Peptide time addition related inhibition.** Dulbecco's Modified Eagle's medium  
366 (DMEM) containing the indicated viruses (MeV IC323-EGFP, MeV IC323-EGFP-F L454W,  
367 MeV IC323-EGFP-F T461I, MeV IC323-EGFP-F N462K all these viruses are from(34)) was  
368 used to infect sub-confluent VERO-SLAM cells in 6 well plates (100pfu/well) for 2h at 32°C.  
369 MeV HRC4 dimeric fusion inhibitory peptide (1μM) was added to the medium at time points  
370 from 15 to 120 min after the beginning of infection. After 2h of incubation with the virus,  
371 medium was replaced with medium containing Avicel. Viral titers were assessed after 3 days  
372 of incubation at 32°C by immune staining.

373 **Beta-Galactosidase (Beta-gal) complementation-based fusion assay.** The beta-gal  
374 complementation-based fusion assay was performed as described previously(34). Briefly,  
375 293T cells transiently transfected with the constructs indicated above and the omega reporter

376 subunit were incubated for the indicated period with cells coexpressing viral glycoproteins  
377 and the alpha reporter subunit in presence or not of MeV F HRC derived peptide (40).

378 **RBC fusion assay.** RBC fusion assays were performed on HEK 293T cells transiently  
379 expressing MV H\_Y17H HPIV3\_T193A chimerae (43) and the indicated MeV Fs. Cell  
380 monolayers were washed three times with serum-free medium, placed at 4°C with 1% RBC in  
381 DMEM for 30 min, then treated with the indicated peptide and placed at 37°C. Zanamivir was  
382 added at a final concentration of 10 mM and the cells were incubated at 4°C, rocked, and the  
383 liquid phase was collected in V-bottomed 96-well plates for measurement of reversibly bound  
384 RBCs. The cells were then incubated at 4°C with ACK-Lysing buffer, and the liquid phase  
385 was collected in V-bottomed 96-well plates for measurement of irreversibly bound RBCs. The  
386 cells were then lysed in lysis buffer and transferred to flat-bottom 96 well plates for  
387 quantification of fused RBCs. The amount of RBCs in each of the four compartments  
388 (released, reversibly bound, irreversibly bound, and fused) was determined by measurement  
389 of absorption at 410 nm.

390 **Co-Immunoprecipitation.** 293T cells were seeded in biocoated 6-well plates (Corning) at  
391  $5 \times 10^5$  cells/well and incubated for 24h, at 37° C. Cells were transfected with plasmid vectors  
392 encoding for MeV H-6xHis, MeV F (*wt*, L454W, T461I, N462K ,E455G, L454W/E455G and  
393 S262R) and mCherry (6:4:1 mixtures; 2.2 µg/well) using Lipofectamine® 2000 (Invitrogen),  
394 according to the manufacturer's recommendations. Transfected cultures were grown at 32° C,  
395 overnight, in the presence of HRC1 peptide (1 µM), to minimize cell-cell fusion. mCherry  
396 fluorescence was used to monitor cell transfection efficiency after 18h. Prior to cell lysis, cell  
397 protein expression was synchronized with cycloheximide (Sigma, 0.1 mg/mL), followed by  
398 membrane protein cross-linking with 3,3'-dithiobis(sulfosuccinimidyl propionate) (Sigma; 1  
399 mM), at low temperature. The cross-linking reaction was quenched with 20 mM Tris, 150  
400 mM NaCl, pH 7.5. Cells were lysed with 50 mM HEPES, 100 mM NaCl, 0.05 g/mL dodecyl



401 maltoside, pH 7.5, supplemented with complete protease inhibitor cocktail (Roche). Lysates  
402 were centrifuged at 16000 g for 10 min to remove nuclei and cell debris, and the supernatant  
403 was collected for immunoprecipitation and total protein content analysis. MeV H-6xHis  
404 protein was immunoprecipitated from cell lysates using Dynabeads® (Thermo, 1 mg/mL)  
405 coated with a 6xHis tag-specific antibody (mouse monoclonal, Thermo, MA1-21315).

406 **For Fig.2:** Co-immunoprecipitated and cell lysate proteins were analyzed by western blotting,  
407 using primary antibodies specific for MeV F HRC (rabbit polyclonal, Genscript, 503028-1)  
408 and 6xHis tag (rabbit polyclonal, Thermo, PA1-983B), followed by an HRP-conjugated anti-  
409 rabbit secondary antibody (Kindle Biosciences, R1006). Western blots were developed using  
410 the SuperSignal West Femto substrate (Thermo) and imaged on a *KwikQuant*<sup>TM</sup> Imager UV  
411 (Kindle Biosciences).

412 **For Fig. 3:** Co-immunoprecipitated and cell lysate proteins were analyzed by western  
413 blotting, using primary antibodies specific for MeV F HRC (rabbit polyclonal, Genscript,  
414 503028-1) and 6xHis tag (rabbit polyclonal, Thermo, PA1-983B), followed by  
415 WesternBreeze Chromogenic Immunodetection Protocol for detection.

416

#### 417 **Literature cited**

- 418 1. Durrheim DN, Andrus JK, Tabassum S, Bashour H, Githanga D, Pfaff G. 2021. A  
419 dangerous measles future looms beyond the COVID-19 pandemic. *Nat Med* 27:360-  
420 361.
- 421 2. Tatsuo H, Ono N, Tanaka K, Yanagi Y. 2000. SLAM (CDw150) is a cellular receptor  
422 for measles virus. *Nature* 406:893-7.
- 423 3. Noyce RS, Bondre DG, Ha MN, Lin LT, Sisson G, Tsao MS, Richardson CD. 2011.  
424 Tumor cell marker PVRL4 (nectin 4) is an epithelial cell receptor for measles virus.  
425 *PLoS Pathog* 7:e1002240.
- 426 4. Muhlebach MD, Mateo M, Sinn PL, Prufer S, Uhlig KM, Leonard VH,  
427 Navaratnarajah CK, Frenzke M, Wong XX, Sawatsky B, Ramachandran S, McCray  
428 PB, Jr., Cichutek K, von Messling V, Lopez M, Cattaneo R. 2011. Adherens junction  
429 protein nectin-4 is the epithelial receptor for measles virus. *Nature* 480:530-3.
- 430 5. Griffin DE, Lin WH, Pan CH. 2012. Measles virus, immune control, and persistence.  
431 *FEMS microbiology reviews* 36:649-62.
- 432 6. Rota PA, Moss WJ, Takeda M, de Swart RL, Thompson KM, Goodson JL. 2016.  
433 Measles. *Nat Rev Dis Primers* 2:16049.



- 434 7. Kija E, Ndondo A, Spittal G, Hardie DR, Eley B, Wilmshurst JM. 2015. Subacute  
435 sclerosing panencephalitis in South African children following the measles outbreak  
436 between 2009 and 2011. *S Afr Med J* 105:713-8.
- 437 8. Angius F, Smuts H, Rybkina K, Stelitano D, Eley B, Wilmshurst J, Ferren M, Lalande  
438 A, Mathieu C, Moscona A, Horvat B, Hashiguchi T, Porotto M, Hardie D. 2019.  
439 Analysis of a Subacute Sclerosing Panencephalitis Genotype B3 Virus from the 2009-  
440 2010 South African Measles Epidemic Shows That Hyperfusogenic F Proteins  
441 Contribute to Measles Virus Infection in the Brain. *J Virol* 93:e01700-18.
- 442 9. Hardie DR, Albertyn C, Heckmann JM, Smuts HE. 2013. Molecular characterisation  
443 of virus in the brains of patients with measles inclusion body encephalitis (MIBE).  
444 *Virology journal* 10:283.
- 445 10. Mathieu C, Ferren M, Jurgens E, Dumont C, Rybkina K, Harder O, Stelitano D,  
446 Madeddu S, Sanna G, Schwartz D, Biswas S, Hardie D, Hashiguchi T, Moscona A,  
447 Horvat B, Niewiesk S, Porotto M. 2019. Measles Virus Bearing Measles Inclusion  
448 Body Encephalitis-Derived Fusion Protein Is Pathogenic after Infection via the  
449 Respiratory Route. *J Virol* 93:e01862-18.
- 450 11. Watanabe S, Shirogane Y, Sato Y, Hashiguchi T, Yanagi Y. 2019. New Insights into  
451 Measles Virus Brain Infections. *Trends Microbiol* 27:164-175.
- 452 12. Mathieu C, Bovier FT, Ferren M, Lieberman NAP, Predella C, Lalande A, Peddu V,  
453 Lin MJ, Addetia A, Patel A, Outlaw V, Corneo B, Dorrello NV, Briese T, Hardie D,  
454 Horvat B, Moscona A, Greninger AL, Porotto M. 2021. Molecular Features of the  
455 Measles Virus Viral Fusion Complex That Favor Infection and Spread in the Brain.  
456 *mBio* doi:10.1128/mBio.00799-21:e0079921.
- 457 13. Yanagi Y, Ono N, Tatsuo H, Hashimoto K, Minagawa H. 2002. Measles virus  
458 receptor SLAM (CD150). *Virology* 299:155-61.
- 459 14. Yanagi Y, Takeda M, Ohno S, Hashiguchi T. 2009. Measles virus receptors. *Current*  
460 *topics in microbiology and immunology* 329:13-30.
- 461 15. Hashiguchi T, Maenaka K, Yanagi Y. 2011. Measles virus hemagglutinin: structural  
462 insights into cell entry and measles vaccine. *Frontiers in microbiology* 2:247.
- 463 16. Yin HS, Paterson RG, Wen X, Lamb RA, Jardetzky TS. 2005. Structure of the  
464 uncleaved ectodomain of the paramyxovirus (hPIV3) fusion protein. *Proc Natl Acad*  
465 *Sci U S A* 102:9288-93.
- 466 17. Lamb RA, Paterson RG, Jardetzky TS. 2006. Paramyxovirus membrane fusion:  
467 lessons from the F and HN atomic structures. *Virology* 344:30-7.
- 468 18. Yin HS, Wen X, Paterson RG, Lamb RA, Jardetzky TS. 2006. Structure of the  
469 parainfluenza virus 5 F protein in its metastable, prefusion conformation. *Nature*  
470 439:38-44.
- 471 19. Harrison SC. 2008. Viral membrane fusion. *Nat Struct Mol Biol* 15:690-8.
- 472 20. Chang A, Dutch RE. 2012. Paramyxovirus fusion and entry: multiple paths to a  
473 common end. *Viruses* 4:613-36.
- 474 21. Plemper RK, Brindley MA, Iorio RM. 2011. Structural and mechanistic studies of  
475 measles virus illuminate paramyxovirus entry. *PLoS pathogens* 7:e1002058.
- 476 22. White JM, Delos SE, Brecher M, Schornberg K. 2008. Structures and mechanisms of  
477 viral membrane fusion proteins: multiple variations on a common theme. *Crit Rev*  
478 *Biochem Mol Biol* 43:189-219.
- 479 23. Sapir A, Avinoam O, Podbilewicz B, Chernomordik LV. 2008. Viral and  
480 developmental cell fusion mechanisms: conservation and divergence. *Dev Cell* 14:11-  
481 21.
- 482 24. Eckert DM, Kim PS. 2001. Design of potent inhibitors of HIV-1 entry from the gp41  
483 N-peptide region. *Proc Natl Acad Sci U S A* 98:11187-92.

- 484 25. Porotto M, Carta P, Deng Y, Kellogg GE, Whitt M, Lu M, Mungall BA, Moscona A.  
485 2007. Molecular determinants of antiviral potency of paramyxovirus entry inhibitors. *J*  
486 *Virol* 81:10567-74.
- 487 26. Schmidt AG, Yang PL, Harrison SC. 2010. Peptide inhibitors of flavivirus entry  
488 derived from the E protein stem. *J Virol* 84:12549-54.
- 489 27. Vigant F, Lee B. 2011. Hendra and nipah infection: pathology, models and potential  
490 therapies. *Infectious disorders drug targets* 11:315-36.
- 491 28. Pessi A, Langella A, Capito E, Ghezzi S, Vicenzi E, Poli G, Ketas T, Mathieu C,  
492 Cortese R, Horvat B, Moscona A, Porotto M. 2012. A general strategy to endow  
493 natural fusion-protein-derived peptides with potent antiviral activity. *PLoS One*  
494 7:e36833.
- 495 29. Steffen DL, Xu K, Nikolov DB, Broder CC. 2012. Henipavirus mediated membrane  
496 fusion, virus entry and targeted therapeutics. *Viruses* 4:280-309.
- 497 30. Miyamoto F, Kodama EN. 2012. Novel HIV-1 fusion inhibition peptides: designing  
498 the next generation of drugs. *Antiviral chemistry & chemotherapy* 22:151-8.
- 499 31. Tan JJ, Ma XT, Liu C, Zhang XY, Wang CX. 2012. The Current Status and  
500 Challenges in the Development of Fusion Inhibitors as Therapeutics for HIV-1  
501 Infection. *Current pharmaceutical design*.
- 502 32. Lee KK, Pessi A, Gui L, Santoprete A, Talekar A, Moscona A, Porotto M. 2011.  
503 Capturing a fusion intermediate of influenza hemagglutinin with a cholesterol-  
504 conjugated peptide, a new antiviral strategy for influenza virus. *J Biol Chem*  
505 286:42141-9.
- 506 33. Sato Y, Watanabe S, Fukuda Y, Hashiguchi T, Yanagi Y, Ohno S. 2018. Cell-to-Cell  
507 Measles Virus Spread between Human Neurons Is Dependent on Hemagglutinin and  
508 Hyperfusogenic Fusion Protein. *J Virol* 92.
- 509 34. Jurgens EM, Mathieu C, Palermo LM, Hardie D, Horvat B, Moscona A, Porotto M.  
510 2015. Measles fusion machinery is dysregulated in neuropathogenic variants. *mBio* 6.
- 511 35. Watanabe S, Shirogane Y, Suzuki SO, Ikegame S, Koga R, Yanagi Y. 2013. Mutant  
512 fusion proteins with enhanced fusion activity promote measles virus spread in human  
513 neuronal cells and brains of suckling hamsters. *Journal of virology* 87:2648-59.
- 514 36. Hashiguchi T, Fukuda Y, Matsuoka R, Kuroda D, Kubota M, Shirogane Y, Watanabe  
515 S, Tsumoto K, Kohda D, Plemper RK, Yanagi Y. 2018. Structures of the prefusion  
516 form of measles virus fusion protein in complex with inhibitors. *Proc Natl Acad Sci U*  
517 *S A* 115:2496-2501.
- 518 37. Porotto M, Devito I, Palmer SG, Jurgens EM, Yee JL, Yokoyama CC, Pessi A,  
519 Moscona A. 2011. Spring-loaded model revisited: paramyxovirus fusion requires  
520 engagement of a receptor binding protein beyond initial triggering of the fusion  
521 protein. *J Virol* 85:12867-80.
- 522 38. Figueira TN, Palermo LM, Veiga AS, Huey D, Alabi CA, Santos NC, Welsch JC,  
523 Mathieu C, Horvat B, Niewiesk S, Moscona A, Castanho M, Porotto M. 2017. In Vivo  
524 Efficacy of Measles Virus Fusion Protein-Derived Peptides Is Modulated by the  
525 Properties of Self-Assembly and Membrane Residence. *J Virol* 91.
- 526 39. Porotto M, Yokoyama CC, Orefice G, Kim HS, Aljofan M, Mungall BA, Moscona A.  
527 2009. Kinetic dependence of paramyxovirus entry inhibition. *J Virol* 83:6947-51.
- 528 40. Mathieu C, Huey D, Jurgens E, Welsch JC, DeVito I, Talekar A, Horvat B, Niewiesk  
529 S, Moscona A, Porotto M. 2015. Prevention of measles virus infection by intranasal  
530 delivery of fusion inhibitor peptides. *J Virol* 89:1143-55.
- 531 41. Welsch JC, Talekar A, Mathieu C, Pessi A, Moscona A, Horvat B, Porotto M. 2013.  
532 Fatal measles virus infection prevented by brain-penetrant fusion inhibitors. *J Virol*  
533 87:13785-94.

- 534 42. Mathieu C, Augusto MT, Niewiesk S, Horvat B, Palermo LM, Sanna G, Madeddu S,  
535 Huey D, Castanho MA, Porotto M, Santos NC, Moscona A. 2017. Broad spectrum  
536 antiviral activity for paramyxoviruses is modulated by biophysical properties of fusion  
537 inhibitory peptides. *Sci Rep* 7:43610.
- 538 43. Talekar A, Moscona A, Porotto M. 2013. Measles virus fusion machinery activated by  
539 sialic acid binding globular domain. *J Virol* 87:13619-27.
- 540 44. Watanabe S, Ohno S, Shirogane Y, Suzuki SO, Koga R, Yanagi Y. 2015. Measles  
541 virus mutants possessing the fusion protein with enhanced fusion activity spread  
542 effectively in neuronal cells, but not in other cells, without causing strong  
543 cytopathology. *J Virol* 89:2710-7.  
544
